# Supplementary material for: Arginase Inhibition Supports Survival and Differentiation of Neuronal Precursors in Adult Alzheimer’s Disease Mice
Source: PubMed Central journal article supplement (PMC7037054; doi:10.3390/ijms21031133), 2020-02-08
Supplement: ijms-21-01133-s001.pdf [file ijms-21-01133-s001.pdf]

Table 1. KAM-1325 array results. %CFC- the percent change of the treated sample in normalized intensity from the specified control. A %CFC value of 100% corresponds to a 2-fold increase in signal intensity with the treatment. A negative %CFC value indicates the degree of reduction in signal intensity from the selected control. The conditional formatting feature for %CFC was set to blue for -100%, and orange for +200%.

| N  | Target Name | P-Site       | Full Target Protein Name                                          | %CFC | Lead     |
|----|-------------|--------------|-------------------------------------------------------------------|------|----------|
| 1  | MEK1        | S222         | MAPK/ERK protein-serine kinase 1 (MKK1)                           | 1495 | Possible |
| 2  | Jun (c-Jun) | Y170         | Jun proto-oncogene-encoded AP1 transcription factor               | 1057 | Possible |
| 3  | Src         | Y419         | Src oncogene-encoded protein-tyrosine kinase                      | 924  | Possible |
| 4  | Syk         | Y323         | Spleen protein-tyrosine kinase                                    | 799  | Priority |
| 5  | MST1        | T187         | Mammalian STE20-like protein-serine kinase 1 (KRS2)               | 566  | Possible |
| 6  | MEK1        | T286         | MAPK/ERK protein-serine kinase 1 (MKK1)                           | 446  | Possible |
| 7  | PDK1        | Pan-specific | 3-phosphoinositide-dependent protein-serine kinase 1              | 426  | Priority |
| 8  | Wee1        | Pan-specific | Wee1 protein-tyrosine kinase                                      | 422  | Priority |
| 9  | Bmx (Etk)   | Y40          | Bone marrow X protein-tyrosine kinase                             | 363  | Possible |
| 10 | MST1        | T183         | Mammalian STE20-like protein-serine kinase 1 (KRS2)               | 360  | Priority |
| 11 | GRK2        | S670         | Beta-adrenergic receptor kinase 1                                 | 334  | Priority |
| 12 | TARDBP      | S409+S410    | TAR DNA-binding protein 43                                        | 285  | Priority |
| 13 | NFKB1       | S932         | Nuclear factor NF-kappa-B p105 subunit                            | 241  | Possible |
| 14 | PFKFB3      | S461         | 6-phosphofructo-2-kinase/fructose-2,6-biphosphatase 3             | 217  | Priority |
| 15 | MEK1        | Pan-specific | MAPK/ERK protein-serine kinase 1 (MKK1)                           | 205  | Priority |
| 16 | PTPN21      | S637         | Tyrosine-protein phosphatase non-receptor type 21                 | 203  | Possible |
| 17 | TH (TY3H)   | S19          | Tyrosine 3-monooxygenase                                          | 172  | Priority |
| 18 | TRRAP       | Pan-specific | Transformation/transcription domain-associated protein            | 167  | Priority |
| 19 | p70S6K      | Pan-specific | Ribosomal protein S6 kinase beta-1; Ribosomal protein S6 kinase 1 | 159  | Possible |
| 20 | PRKACB      | S339         | cAMP-dependent protein-serine kinase catalytic subunit beta       | 156  | Possible |
| 21 | ROCK2       | Y722         | Rho-associated protein kinase 2                                   | 150  | Possible |
| 22 | Met         | Y1003        | Hepatocyte growth factor (HGF) receptor-tyrosine kinase           | 134  | Priority |
| 23 | MAFG        | S124         | Transcription factor MafG                                         | 116  | Priority |

|    |              |              |                                                                |     |          |
|----|--------------|--------------|----------------------------------------------------------------|-----|----------|
| 24 | mTOR         | S2478+S2481  | Mammalian target of rapamycin (FRAP)                           | 112 | Possible |
| 25 | PDK1         | S241         | 3-phosphoinositide-dependent protein-serine kinase 1           | 95  | Priority |
| 26 | Frk          | Pan-specific | Fyn-related kinase; Tyrosine-protein kinase FRK                | 95  | Possible |
| 27 | NFkB p50     | S337         | Nuclear factor NF-kappa-B p105 subunit                         | 94  | Possible |
| 28 | PCYT1A       | S329+S331    | CTP: phosphocholine cytidyltransferase isoform A               | 72  | Possible |
| 29 | mTOR         | Pan-specific | Mammalian target of rapamycin (FRAP)                           | 66  | Possible |
| 30 | STAG2        | Y433         | Putative uncharacterized protein DKFZp781H1753                 | 60  | Possible |
| 31 | PTEN         | Pan-specific | Phosphatidylinositol-3,4,5-trisphosphate 3-phosphatase         | 55  | Possible |
| 32 | GRK7         | Pan-specific | Rhodopsin kinase                                               | 46  | Possible |
| 33 | MKK3         | S218         | MAPK/ERK protein-serine kinase 3 beta isoform (MKK3 beta)      | 45  | Possible |
| 34 | Kit          | Y721         | Mast/stem cell growth factor receptor protein-tyrosine Kit     | 45  | Possible |
| 35 | CDK7         | Pan-specific | Cyclin-dependent protein-serine kinase 7                       | -46 | Possible |
| 36 | HDAC4        | S246         | Histone deacetylase 4                                          | -48 | Possible |
| 37 | CTNNB1       | Y654         | Catenin (cadherin-associated protein) beta 1                   | -55 | Possible |
| 38 | PKD3         | Pan-specific | Protein-serine kinase C nu; Serine/threonine-protein kinase D3 | -64 | Possible |
| 39 | HDAC5        | S498         | Histone deacetylase 5                                          | -65 | Possible |
| 40 | H2AFX        | S139         | Histone H2A.X                                                  | -74 | Possible |
| 41 | IGF1R        | Y1161+T1163  | Insulin-like growth factor 1 receptor protein-tyrosine kinase  | -74 | Possible |
| 42 | p38d MAPK    | Pan-specific | Mitogen-activated protein-serine kinase p38 delta              | -78 | Possible |
| 43 | CDK5         | Y15          | Cyclin-dependent protein-serine kinase 5                       | -85 | Priority |
| 44 | Myc          | S373         | Myc proto-oncogene protein                                     | -87 | Possible |
| 45 | TEC          | Y519         | Tyrosine-protein kinase Tec                                    | -88 | Priority |
| 46 | JAK1         | Y1022        | Janus protein-tyrosine kinase 1                                | -88 | Possible |
| 47 | RSK1(p90RSK) | S352         | Ribosomal S6 protein-serine kinase 1                           | -90 | Possible |
| 48 | RelB         | Pan-specific | Transcription factor RelB                                      | -91 | Possible |
